# Supplementary material
Source: PubMed Central journal article supplement (PMC6205604)
Supplement: NIHMS79845-supplement-Supplementary_information_S1.pdf [file NIHMS79845-supplement-Supplementary_information_S1.pdf]

## Supplementary information S1 (box) | RNA Polymerase II post-translational modifications

RNA Polymerase II (Pol II) can be extensively post-translationally modified, mainly at its carboxy-terminal domain (CTD), which consists of several dozen repeats of a highly conserved heptapeptide (reviewed in REF. 1). Specific modifications of the CTD define different states of Pol II throughout the transcription process<sup>2</sup>. They are involved in regulating Pol II transitions between the initiation, elongation and termination states, and in coupling of various co-transcriptional processes, such as mRNA capping or splicing, with specific phases of transcription<sup>3</sup>.

The most studied modifications involved in transcription are phosphorylation of Ser2, Ser5 and Ser7. Phosphorylated Ser5 (Ser5P) and Ser7P are associated with initiating Pol II, whereas Ser2P is a mark of actively elongating Pol II after pause-release. The phosphorylation of these residues is catalysed by specific kinases whose activity can be regulated, thereby controlling Pol II progression and transcription. Ser5P and Ser7P are deposited by cyclin-dependent kinase 7 (CDK7), which is a subunit of the general transcription factor TFIID (transcription factor IID), and in yeast this is stimulated by the Mediator complex<sup>4</sup>. Ser2P is deposited by CDK9, which is a subunit of positive transcription elongation factor b (P-TEFb), and which also phosphorylates negative elongation factor (NELF) and DRB sensitivity inducing factor (DSIF), thereby allowing Pol II to overcome pausing and enter productive elongation<sup>5</sup>. P-TEFb can be recruited to core promoters by the transcription cofactor bromodomain-containing protein 4 (BRD4)<sup>6,7</sup>, which is employed by many enhancers<sup>6,7</sup> and is involved in regulating specific subset of genes<sup>8-10</sup>. Interestingly, BRD4 itself has kinase activity and can phosphorylate Ser2 *in vitro*<sup>11</sup>, but it is not clear how this contributes to activation of transcription by Pol II at core promoters *in vivo*.

Additional modifications of the Pol II CTD involved in transcription include Lys acetylation by p300 downstream of transcription start sites, which has a role in the induction of growth-factor response genes<sup>12</sup>.

1. Harlen, K. M. & Churchman, L. S. The code and beyond: transcription regulation by the RNA polymerase II carboxy-terminal domain. *Nat. Rev. Mol. Cell Biol.* **18**, 263–273 (2017).
2. Heidemann, M., Hintermair, C., Voß, K. & Eick, D. Dynamic phosphorylation patterns of RNA polymerase

- II CTD during transcription. *Biochim. Biophys. Acta* **1829**, 55–62 (2013).
3. Harlen, K. M. *et al.* Comprehensive RNA Polymerase II Interactomes Reveal Distinct and Varied Roles for Each Phospho-CTD Residue. *Cell Rep.* **15**, 2147–2158 (2016).
  4. Esnault, C. *et al.* Mediator-dependent recruitment of TFIID modules in preinitiation complex. *Mol. Cell* **31**, 337–346 (2008).
  5. Lis, J. T., Mason, P., Peng, J., Price, D. H. & Werner, J. P-TEFb kinase recruitment and function at heat shock loci. *Genes Dev.* **14**, 792–803 (2000).
  6. Yang, Z. *et al.* Recruitment of P-TEFb for stimulation of transcriptional elongation by the bromodomain protein Brd4. *Mol. Cell* **19**, 535–545 (2005).
  7. Jang, M. K. *et al.* The bromodomain protein Brd4 is a positive regulatory component of P-TEFb and stimulates RNA polymerase II-dependent transcription. *Mol. Cell* **19**, 523–534 (2005).
  8. Zuber, J. *et al.* RNAi screen identifies Brd4 as a therapeutic target in acute myeloid leukaemia. *Nature* **478**, 524–528 (2011).
  9. Delmore, J. E. *et al.* BET bromodomain inhibition as a therapeutic strategy to target c-Myc. *Cell* **146**, 904–917 (2011).
  10. Lovén, J. *et al.* Selective inhibition of tumor oncogenes by disruption of super-enhancers. *Cell* **153**, 320–334 (2013).
  11. Devaiah, B. N. *et al.* BRD4 is an atypical kinase that phosphorylates serine2 of the RNA polymerase II carboxy-terminal domain. *Proc. Natl. Acad. Sci. U.S.A.* **109**, 6927–6932 (2012).
  12. Schröder, S. *et al.* Acetylation of RNA Polymerase II Regulates Growth-Factor-Induced Gene Transcription in Mammalian Cells. *Mol. Cell* **52**, 314–324 (2013).
